# Supplementary material
Source: PubMed Central journal article supplement (PMC8520731)
Supplement: joces-134-258587-s1.pdf [file joces-134-258587-s1.pdf]

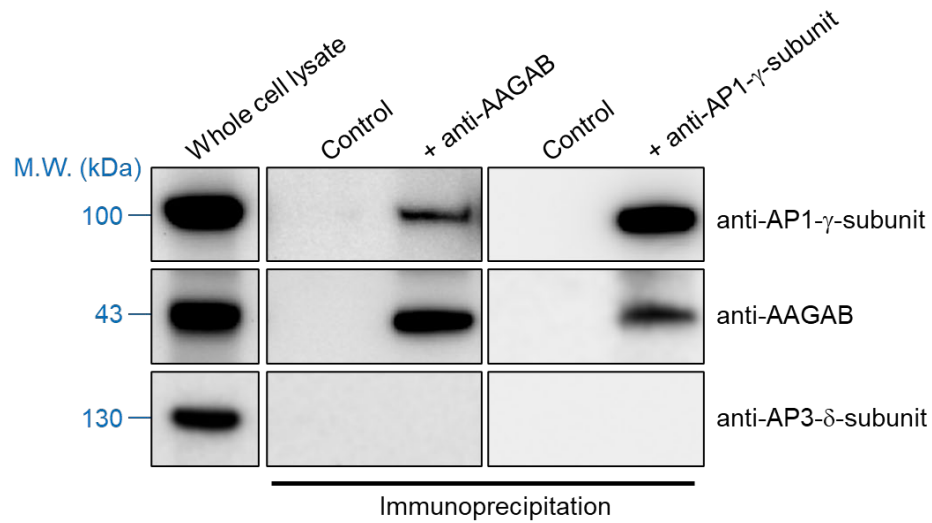

**Fig. S1. Interactions of endogenous AAGAB and AP1.** Endogenous AAGAB and AP1  $\gamma$  subunit were immunoprecipitated from extracts of wild-type (WT) HeLa cells using protein G agarose beads with anti-AAGAB or anti-AP1- $\gamma$  antibodies. The presence of AAGAB, AP1  $\gamma$  subunit, and AP3  $\delta$  subunit in the immunoprecipitates was detected using anti-AAGAB, anti-AP1- $\gamma$ , and anti-AP3- $\delta$  antibodies, respectively. Protein G agarose beads were added without antibodies as a control.

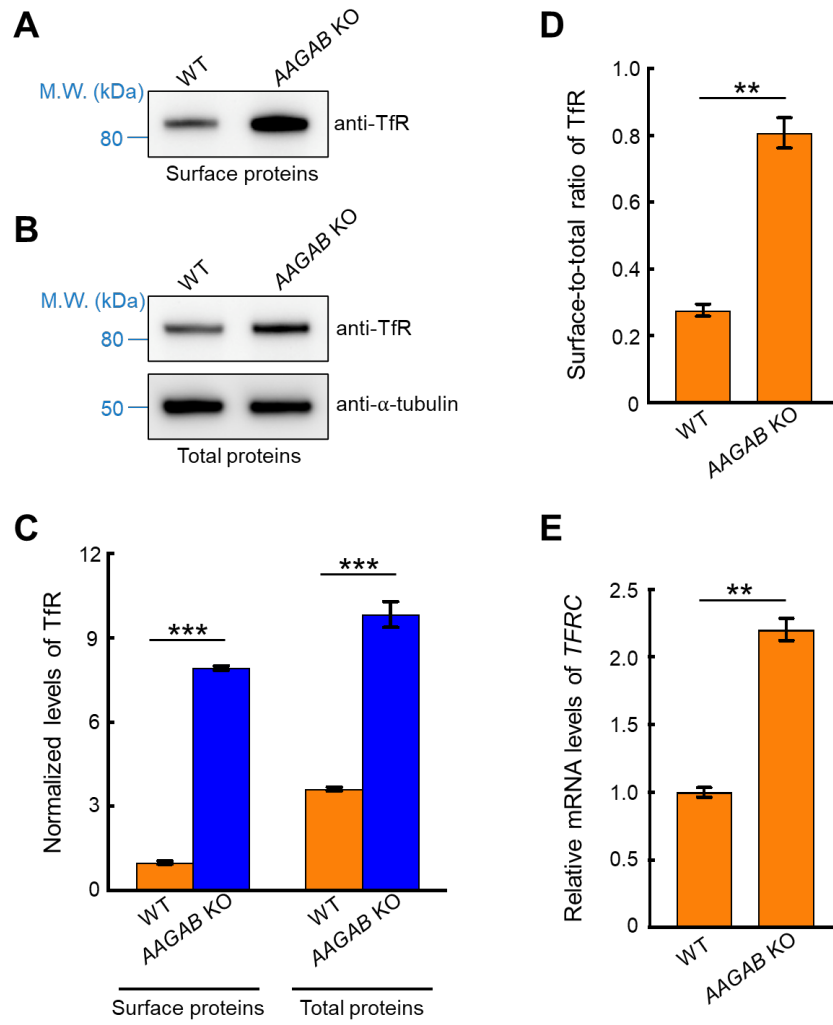

**Fig. S2. Surface and total transferrin receptor (TfR) levels in WT and *AAGAB* knockout (KO) cells.** (A) Representative immunoblot showing surface TfR in WT and *AAGAB* KO HeLa cells. Surface proteins were biotinylated using Sulfo-NHS-Biotin and isolated by NeutrAvidin agarose. (B) Representative immunoblots showing total TfR and  $\alpha$ -tubulin in WT and *AAGAB* KO HeLa cells. (C) Flow cytometry measurements showing normalized surface and total levels of TfR in WT and *AAGAB* KO HeLa cells. To measure total TfR, cells were disassociated by accutase, fixed using 2% paraformaldehyde, permeabilized using 0.1% saponin, and stained with monoclonal anti-TfR antibodies and APC-conjugated secondary antibodies. To measure surface TfR, cells were processed and analyzed in a similar way except that saponin was omitted. APC fluorescence of ~5,000 cells was measured on a CyAN ADP analyzer. Mean APC fluorescence of a sample was normalized to that of surface staining in WT cells. Data are presented as mean  $\pm$  SD,  $n = 3$ . \*\*\*  $p < 0.001$ .  $P$  values were calculated using one-way ANOVA. (D) The surface-to-total ratio of TfR was calculated from data in C. A Student's t-test was used to calculate statistical significance using three independent datasets. \*\*  $p < 0.01$ . (E) Relative mRNA levels of *TFRC*, which encodes human TfR, were calculated by normalizing the threshold cycles of *TFRC* to those of *GAPDH*, a gene whose expression remained unchanged in *AAGAB* KO HeLa cells. The fold change was determined by comparing the normalized threshold cycles of *AAGAB* KO cells to those of WT cells. A Student's t-test was used to calculate statistical significance using three independent datasets. \*\*  $p < 0.01$ .

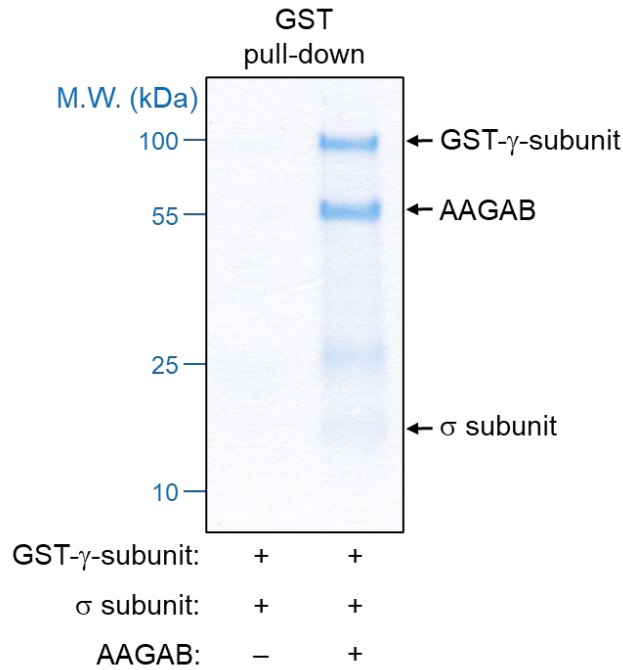

**Fig. S3. AP1  $\gamma$  and  $\sigma$  subunits cannot be expressed in *E. coli* unless AAGAB is co-expressed.** GST- $\gamma$ -subunit (trunk domain) and untagged  $\sigma$  subunit were co-expressed in *E. coli* at 37 °C with or without His<sub>6</sub>-SUMO-AAGAB. GST- $\gamma$ -subunit and associated proteins were isolated as described in Figure 6, resolved on SDS-PAGE, and stained with coomassie blue.

**Table S1. Whole-cell proteomes of WT and *AAGAB* KO HeLa cells.** To calculate relative expression levels, values of *AAGAB* KO HeLa cells were divided by those of WT cells.

[Click here to download Table S1](#)

**Table S2. Surface proteomic analysis of WT and *APIGI* KO HeLa cells.** To calculate relative surface levels in Tables S2-S4, values of a HeLa KO cell line were divided by those of WT cells. Data are presented as relative expression levels to WT. *P* values were calculated using Student's t-test by comparing relative surface levels of a protein with those of ACTR2, which remained unchanged in all KO cell lines.

[Click here to download Table S2](#)

**Table S3. Surface proteomic analysis of WT and *AP2S1* KO HeLa cells.**

[Click here to download Table S3](#)

**Table S4. Surface proteomic analysis of WT and *AAGAB* KO HeLa cells.**

[Click here to download Table S4](#)

**Table S5. Ranking of genes based on CRISPR scores (essentiality) in HeLa cells.** The reads in the passage control were divided by those in the initial plasmid library to calculate fold changes. Predicted essential genes are highlighted in bold with a CRISPR score cutoff of -0.25. Genes encoding *AAGAB*, *AP1* and *AP2* are highlighted in boxes.

[Click here to download Table S5](#)
